# Supplementary material for: Multiple Independent Retroelement Insertions in the Promoter of a Stress Response Gene Have Variable Molecular and Functional Effects in Drosophila
Source: PubMed Central journal article supplement (PMC4982627; doi:10.1371/journal.pgen.1006249), 2016-08-12

**Figure S5**

10 strains with *FBti0019985* and 15 without

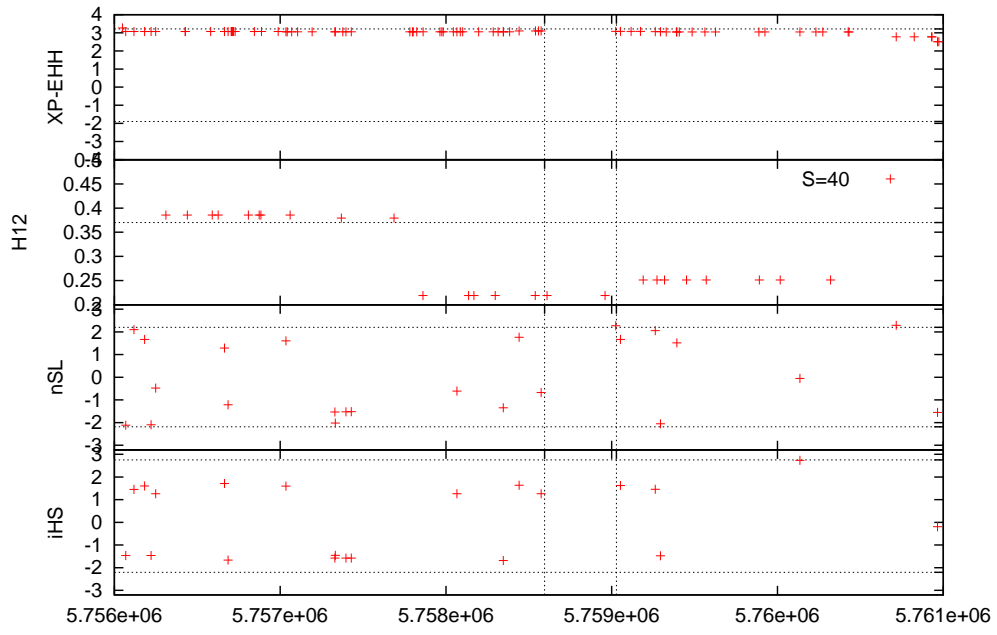

Supplement: pgen.1006249.s005.pdf [file pgen.1006249.s005.pdf]
