# Supplementary material for: Multiple Independent Retroelement Insertions in the Promoter of a Stress Response Gene Have Variable Molecular and Functional Effects in Drosophila
Source: PubMed Central journal article supplement (PMC4982627; doi:10.1371/journal.pgen.1006249), 2016-08-12

**Figure S6**

23 strains with insertion, 15 strains without insertion

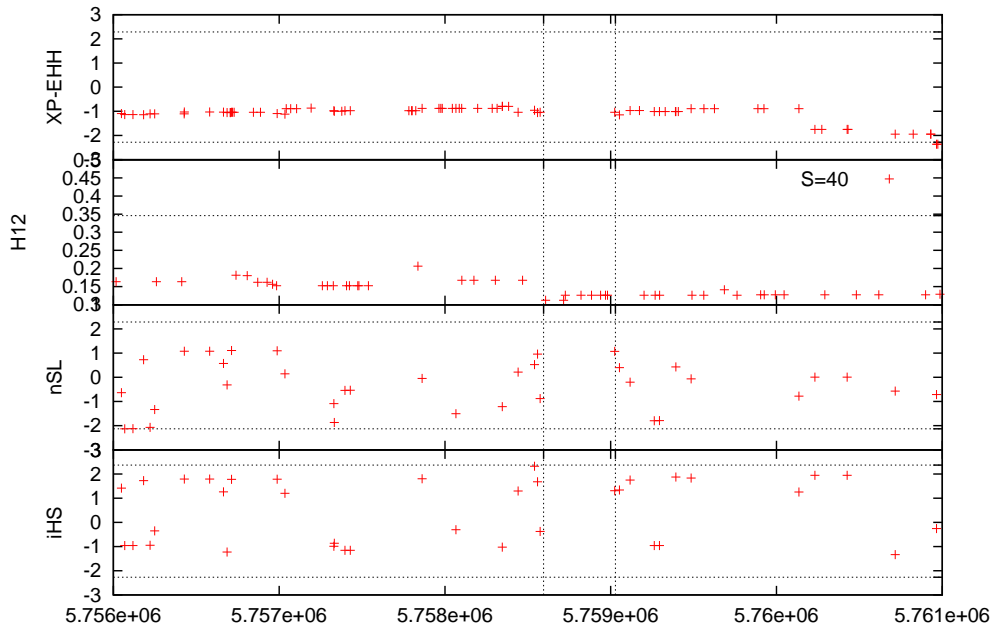

Supplement: pgen.1006249.s006.pdf [file pgen.1006249.s006.pdf]
