# Supplementary material for: Multiple Independent Retroelement Insertions in the Promoter of a Stress Response Gene Have Variable Molecular and Functional Effects in Drosophila
Source: PLoS Genet. 2016 Aug 12;12(8):e1006249. doi: 10.1371/journal.pgen.1006249 (PMC4982627; doi:10.1371/journal.pgen.1006249)
Supplement: S1 Table — (A) Summary of the T-lex2 results in all populations. (B) Results for DGRP population. (C) Results for Sweden population. (D) Results for Zambia population. (E) Results for the Italian population for which PCRs were also performed. (F) Results for the DGRP strains for which PCR were also performed. (XLSX) [file pgen.1006249.s007.xlsx]

## Sheet: Summary
Supplementary table S1A. Allele frequency of all the nine roo solo-LTR insertions analyzed. T-lex2 results per strain.
	Population
	North Carolina (DGRP)			Italy	Sweden	Zambia
roo insertion	Allele frequency (% PCR)	Allele frequency (% T-lex2)	Total frequency	Allele frequency (% PCR)	Allele frequency (% T-lex2)	Allele frequency (% T-lex2)	% Allele frequency Out of Africa	% Allele frequency Total
FBti0019985	11.1111	19.4444	14.4444	8.33	3.57143	1.47059	10.3659	7.56303
roo+7	18.5185	3.125	12.7907	0	0	1.51515	7.23684	5.50459
roo+175	0	0	0	4.17	0	2.43902	0.588235	1.19048
roo+278	3.7037	0	2.12766	0	0	1.21951	1.19048	1.2
roo-19	0	0	0	16.67	0	1.31579	2.53165	2.13675
roo-28	0	0	0	4.17	0	1.31579	0.625	0.847458
roo-44	7.40741	25	13.9535	0	0	1.6129	8.33333	5.9633
roo-68	7.40741	13.3333	9.52381	4.17	2.38095	12.5	6.66667	8.41121
roo-90	20.3704	10.5263	16.3043	4.17	11.3636	3.75	13.125	10
9 insertions	69	57	64	42	17	23	47	39

## Sheet: T-lex2 results DGRP
Supplementary table S1B. Allele frequency of all the nine roo solo-LTR insertions analyzed. T-lex2 results per strain in DGRP population.
	T-lex2 results
Strain	FBti0019985	roo+7	roo+175	roo+278	roo-19	roo-28	roo-44	roo-68	roo-90	TOTAL
RAL142	no data	no data	absent	absent	no data	no data	no data	no data	no data	absent
RAL235	absent	absent	absent	absent	absent	absent	absent	absent	absent	absent
RAL31	absent	absent	absent	absent	absent	absent	absent	absent	absent	absent
RAL382	absent	absent	absent	absent	absent	absent	absent	absent	absent	absent
RAL566	absent	absent	absent	absent	absent	absent	absent	absent	absent	absent
RAL57	absent	absent	absent	absent	absent	absent	absent	absent	absent	absent
RAL634	absent	absent	absent	absent	no data	no data	no data	no data	absent	absent
RAL892	absent	absent	absent	absent	absent	absent	absent	no data	no data	absent
RAL149	present	no data	absent	absent	no data	no data	no data	absent	absent	FBti0019985
RAL42	present	no data	absent	absent	no data	no data	absent	no data	absent	FBti0019985
RAL491	present	no data	absent	absent	absent	no data	absent	absent	absent	FBti0019985
RAL85	polymorphic	absent	absent	absent	absent	absent	absent	no data	absent	FBti0019985 (polymorphic)
RAL129	absent	absent	absent	polymorphic	absent	absent	absent	no data	present	no data
RAL158	polymorphic	absent	absent	absent	absent	absent	absent	absent	present	no data
RAL161	absent	absent	absent	polymorphic	absent	absent	no data	present	no data	no data
RAL176	present	present	polymorphic	polymorphic	no data	no data	absent	absent	absent	no data
RAL181	polymorphic	absent	polymorphic	polymorphic	absent	absent	absent	polymorphic	present	no data
RAL228	absent	polymorphic	absent	absent	absent	absent	absent	no data	present	no data
RAL229	absent	absent	polymorphic	absent	absent	absent	absent	absent	polymorphic	no data
RAL239	absent	absent	polymorphic	absent	absent	absent	absent	present	absent	no data
RAL256	polymorphic	absent	absent	absent	polymorphic	absent	absent	present	absent	no data
RAL332	polymorphic	polymorphic	polymorphic	absent	absent	absent	polymorphic	absent	present	no data
RAL350	absent	absent	absent	absent	polymorphic	absent	absent	absent	present	no data
RAL45	absent	absent	absent	absent	absent	polymorphic	absent	absent	present	no data
RAL49	absent	polymorphic	absent	absent	absent	absent	absent	absent	polymorphic	no data
RAL517	polymorphic	polymorphic	polymorphic	polymorphic	polymorphic	polymorphic	polymorphic	present	polymorphic	no data
RAL555	present	no data	absent	polymorphic	present	no data	absent	absent	absent	no data
RAL59	present	absent	absent	polymorphic	absent	absent	absent	absent	absent	no data
RAL642	absent	polymorphic	absent	absent	absent	polymorphic	polymorphic	absent	absent	no data
RAL69	absent	polymorphic	absent	absent	absent	absent	absent	polymorphic	present	no data
RAL707	absent	absent	absent	absent	absent	absent	absent	present	present	no data
RAL727	absent	polymorphic	polymorphic	absent	absent	polymorphic	polymorphic	present	polymorphic	no data
RAL73	absent	absent	polymorphic	absent	absent	absent	absent	absent	present	no data
RAL738	absent	absent	absent	polymorphic	absent	absent	present	polymorphic	absent	no data
RAL757	polymorphic	absent	absent	absent	polymorphic	polymorphic	absent	absent	polymorphic	no data
RAL786	present	present	polymorphic	polymorphic	polymorphic	polymorphic	polymorphic	polymorphic	polymorphic	no data
RAL799	absent	no data	absent	polymorphic	polymorphic	polymorphic	absent	polymorphic	absent	no data
RAL808	polymorphic	absent	absent	absent	polymorphic	absent	polymorphic	absent	polymorphic	no data
RAL852	absent	absent	absent	absent	polymorphic	absent	present	no data	absent	no data
RAL861	present	present	absent	absent	absent	absent	absent	absent	polymorphic	no data
RAL91	no data	absent	absent	absent	absent	absent	absent	present	present	no data
RAL138	absent	absent	absent	absent	absent	absent	present	absent	absent	roo-44
RAL321	absent	absent	absent	absent	absent	absent	present	absent	absent	roo-44
RAL370	absent	absent	absent	absent	absent	absent	present	absent	absent	roo-44
RAL38	absent	absent	absent	absent	absent	absent	present	no data	absent	roo-44
RAL317	absent	absent	no data	absent	no data	absent	no data	present	absent	roo-68
RAL381	absent	absent	absent	absent	absent	absent	absent	present	absent	roo-68
RAL93	no data	polymorphic	absent	absent	absent	absent	absent	absent	absent	roo+7 (polymorphic)
RAL100	absent	absent	absent	absent	absent	absent	absent	absent	present	roo-90
RAL336	no data	no data	absent	no data	no data	no data	no data	absent	present	roo-90

## Sheet: T-lex2 results Sweden
Supplementary table S1C. Allele frequency of all the nine roo solo-LTR insertions analyzed. T-lex2 results per strain in Sweden population.
	T-lex2 results
Strain	FBti0019985	roo+7	roo+175	roo+278	roo-19	roo-28	roo-44	roo-68	roo-90	TOTAL
B14	absent	absent	absent	absent	absent	absent	absent	polymorphic	absent	roo-68 (polymorphic)
B16	polymorphic	absent	absent	absent	absent	absent	absent	absent	no data	FBti0019985 (polymorphic)
B17	absent	absent	absent	absent	no data	absent	absent	absent	no data	absent
B18	absent	absent	absent	absent	absent	absent	absent	absent	polymorphic	roo-90 (polymorphic)
B21	absent	absent	absent	absent	absent	absent	polymorphic	absent	polymorphic	no data
B22	absent	absent	absent	absent	absent	absent	polymorphic	no data	absent	roo44 (polymorphic)
B24	absent	absent	absent	absent	absent	absent	absent	absent	absent	absent
B25	absent	no data	absent	absent	absent	absent	absent	absent	absent	absent
B26	absent	absent	absent	absent	absent	absent	absent	absent	absent	absent
B27	no data	absent	absent	absent	absent	absent	absent	no data	polymorphic	roo-90 (polymorphic)
B29	absent	absent	absent	absent	absent	absent	absent	absent	absent	absent
B32	absent	absent	absent	absent	absent	absent	absent	absent	absent	absent
B33	absent	absent	absent	absent	absent	absent	absent	no data	polymorphic	roo-90 (polymorphic)
B36	absent	no data	absent	absent	absent	absent	absent	absent	absent	absent
B38	absent	absent	absent	absent	absent	absent	absent	absent	absent	absent
B39	absent	absent	absent	absent	absent	absent	absent	absent	polymorphic	roo-90 (polymorphic)
B4	polymorphic	no data	absent	absent	absent	absent	absent	absent	absent	FBti0019985 (polymorphic)
B41	absent	absent	absent	absent	absent	absent	no data	absent	absent	absent
B42	absent	absent	absent	absent	absent	absent	absent	absent	absent	absent
B45	absent	absent	absent	absent	absent	absent	absent	absent	absent	absent
B46	absent	no data	absent	absent	absent	absent	no data	no data	absent	absent
B47	absent	absent	absent	absent	absent	absent	absent	absent	absent	absent
B6	absent	absent	absent	absent	absent	absent	absent	absent	absent	absent
B7	absent	absent	absent	absent	absent	absent	no data	absent	no data	absent
B8	absent	absent	absent	absent	absent	absent	absent	absent	absent	absent
B9	absent	absent	absent	absent	absent	absent	absent	no data	polymorphic	roo-90 (polymorphic)
S3	absent	no data	absent	no data	absent	absent	absent	absent	no data	absent

## Sheet: T-lex2 results Zambia
Supplementary table S1D. Allele frequency of all the nine roo solo-LTR insertions analyzed. T-lex2 results per strain in Zambia population.
	T-lex2 results
Strain	FBti0019985	roo+7	roo+175	roo+278	roo-19	roo-28	roo-44	roo-68	roo-90	TOTAL
ZI10	absent	absent	absent	polymorphic	absent	absent	polymorphic	polymorphic	absent	no data
ZI114N	absent	absent	absent	absent	absent	absent	absent	polymorphic	polymorphic	no data
ZI117	absent	absent	absent	absent	absent	absent	absent	polymorphic	polymorphic	no data
ZI161	no data	no data	absent	absent	absent	absent	absent	absent	absent	absent
ZI184	absent	absent	absent	absent	polymorphic	absent	polymorphic	polymorphic	polymorphic	no data
ZI194	absent	absent	absent	absent	absent	polymorphic	no data	present	polymorphic	no data
ZI206	absent	absent	absent	absent	polymorphic	no data	polymorphic	absent	polymorphic	no data
ZI207	absent	absent	absent	absent	absent	absent	absent	polymorphic	polymorphic	no data
ZI210	absent	absent	absent	absent	absent	absent	absent	absent	absent	absent
ZI213	polymorphic	absent	absent	polymorphic	polymorphic	absent	absent	absent	polymorphic	no data
ZI214	absent	absent	absent	absent	polymorphic	absent	absent	polymorphic	absent	no data
ZI219	polymorphic	absent	absent	absent	absent	absent	absent	polymorphic	absent	no data
ZI228	absent	no data	absent	absent	absent	absent	absent	absent	polymorphic	roo-90 (polymorphic)
ZI230	absent	no data	absent	absent	absent	absent	no data	absent	absent	absent
ZI232	no data	no data	absent	absent	absent	absent	absent	absent	polymorphic	roo-90 (polymorphic)
ZI235	no data	no data	absent	absent	absent	absent	absent	polymorphic	absent	roo-68 (polymorphic)
ZI237	polymorphic	absent	absent	absent	absent	absent	absent	polymorphic	absent	no data
ZI239	absent	absent	absent	absent	absent	absent	absent	absent	absent	absent
ZI250	absent	absent	absent	no data	absent	polymorphic	absent	polymorphic	absent	no data
ZI252	absent	absent	absent	absent	absent	absent	no data	no data	absent	absent
ZI253	no data	no data	absent	polymorphic	absent	absent	absent	absent	absent	roo+278 (polymorphic)
ZI255	absent	absent	polymorphic	absent	absent	absent	polymorphic	absent	absent	no data
ZI264	polymorphic	absent	absent	absent	absent	polymorphic	present	no data	absent	no data
ZI265	absent	absent	absent	absent	absent	absent	absent	polymorphic	absent	roo-68 (polymorphic)
ZI27	absent	absent	absent	absent	absent	absent	absent	absent	absent	absent
ZI271	no data	no data	no data	absent	absent	no data	absent	no data	absent	absent
ZI284	absent	absent	polymorphic	absent	absent	absent	absent	polymorphic	absent	no data
ZI292	absent	absent	absent	absent	absent	absent	absent	absent	absent	absent
ZI296	absent	absent	absent	absent	absent	polymorphic	absent	polymorphic	absent	no data
ZI303	absent	absent	absent	absent	absent	absent	no data	no data	absent	absent
ZI311N	absent	polymorphic	absent	absent	absent	polymorphic	no data	no data	absent	no data
ZI320	absent	absent	absent	absent	absent	absent	absent	polymorphic	polymorphic	no data
ZI321	absent	absent	polymorphic	absent	no data	absent	no data	no data	absent	roo+175 (polymorphic)
ZI324	absent	absent	absent	absent	absent	polymorphic	absent	absent	absent	roo-28 (polymorphic)
ZI332	absent	absent	absent	absent	absent	absent	absent	absent	absent	absent
ZI339	absent	absent	absent	absent	absent	absent	absent	absent	polymorphic	roo-90 (polymorphic)
ZI341	absent	absent	absent	absent	absent	polymorphic	present	no data	absent	no data
ZI344	absent	absent	absent	absent	absent	absent	absent	polymorphic	absent	roo-68 (polymorphic)
ZI348	polymorphic	absent	absent	polymorphic	absent	absent	polymorphic	polymorphic	polymorphic	no data
ZI357N	absent	absent	absent	absent	absent	absent	absent	polymorphic	absent	roo-68 (polymorphic)
ZI364	absent	absent	absent	absent	absent	absent	absent	absent	absent	absent
ZI365	absent	absent	absent	no data	absent	absent	absent	absent	absent	absent
ZI378	absent	absent	absent	absent	absent	absent	polymorphic	polymorphic	polymorphic	no data
ZI379	absent	absent	absent	absent	absent	absent	no data	no data	no data	absent
ZI384	absent	absent	absent	absent	absent	absent	absent	polymorphic	absent	roo-68 (polymorphic)
ZI386	absent	polymorphic	absent	absent	absent	absent	no data	no data	absent	roo+7 (polymorphic)
ZI398	absent	absent	absent	absent	absent	absent	absent	absent	absent	absent
ZI400	absent	absent	absent	absent	absent	no data	absent	absent	absent	absent
ZI402	absent	absent	absent	absent	no data	absent	no data	no data	absent	absent
ZI418N	polymorphic	absent	absent	absent	absent	absent	no data	no data	absent	FBti0019985 (polymorphic)
ZI420	absent	absent	polymorphic	absent	no data	no data	no data	absent	absent	roo+175 (polymorphic)
ZI437	absent	absent	absent	absent	absent	absent	absent	absent	absent	absent
ZI443	absent	absent	absent	absent	absent	absent	absent	absent	absent	absent
ZI445	absent	absent	absent	absent	absent	absent	no data	no data	absent	absent
ZI447	absent	absent	absent	absent	absent	absent	polymorphic	absent	absent	roo-44 (polymorphic)
ZI455N	absent	absent	absent	absent	absent	absent	absent	absent	absent	absent
ZI456	absent	absent	absent	absent	polymorphic	absent	polymorphic	absent	absent	no data
ZI457	absent	absent	absent	absent	absent	absent	absent	polymorphic	polymorphic	no data
ZI460	polymorphic	absent	absent	absent	absent	absent	polymorphic	absent	absent	no data
ZI476	no data	no data	absent	absent	absent	absent	no data	absent	absent	absent
ZI477	absent	absent	absent	absent	no data	absent	absent	no data	absent	absent
ZI486	polymorphic	absent	absent	absent	absent	absent	absent	polymorphic	polymorphic	no data
ZI517	absent	absent	absent	absent	absent	no data	absent	polymorphic	absent	roo-68 (polymorphic)
ZI76	no data	absent	absent	absent	absent	absent	absent	absent	no data	absent
ZI85	absent	absent	absent	absent	absent	absent	absent	polymorphic	absent	roo-68 (polymorphic)
ZI90	absent	absent	absent	absent	polymorphic	absent	absent	absent	absent	roo-19 (polymorphic)
ZI99	no data	no data	absent	absent	absent	absent	absent	polymorphic	absent	roo-68 (polymorphic)

## Sheet: Control dataset 1
Supplementary table S1E. Allele frequency of all the nine roo solo-LTR insertions analyzed. T-lex2 results per strain in Italian population.
	T-lex2 results
Strain	FBti0019985	roo+7	roo+175	roo+278	roo-19	roo-28	roo-44	roo-68	roo-90	TOTAL
IV145	absent	absent	polymorphic	absent	absent	absent	absent	absent	absent	roo+175 (polymorphic)
IV148	absent	absent	absent	absent	absent	absent	absent	no_data	absent	absent
IV22	absent	absent	absent	absent	absent	absent	absent	absent	absent	absent
IV33	absent	absent	absent	absent	absent	absent	absent	absent	absent	absent
IV40	absent	absent	absent	absent	absent	polymorphic	absent	absent	absent	roo-28 (polymorphic)
IV49	absent	absent	absent	absent	absent	absent	absent	absent	absent	absent
IV52	absent	absent	absent	absent	absent	absent	absent	absent	absent	absent
IV66	polymorphic	absent	absent	absent	absent	absent	absent	absent	absent	FBti0019985 (polymorphic)
IV68	polymorphic	absent	absent	absent	absent	absent	absent	absent	absent	FBti0019985 (polymorphic)
IV69	absent	absent	absent	absent	absent	absent	absent	polymorphic	absent	roo-68
IV72	absent	absent	absent	absent	absent	absent	absent	absent	absent	absent
IV75	absent	absent	absent	absent	absent	absent	absent	absent	polymorphic	roo-90 (polymorphic)
IV125	polymorphic	absent	absent	absent	absent	absent	absent	absent	polymorphic	no data
IV127	absent	absent	absent	absent	polymorphic	polymorphic	absent	absent	polymorphic	no data
IV42	absent	absent	absent	absent	present	present	absent	absent	polymorphic	no data
IV50	absent	no data	absent	absent	polymorphic	absent	absent	absent	polymorphic	no data
*Note that these strains where also estimated with PCR

## Sheet: Contron dataset 2
Supplementary table S1F. Allele frequency of all the nine roo solo-LTR insertions analyzed. T-lex2 results per strain in DGRP population.
	T-lex2 results
Strain	FBti0019985	roo+7	roo+175	roo+278	roo-19	roo-28	roo-44	roo-68	roo-90	TOTAL
RAL776	absent	absent	absent	polymorphic	absent	absent	absent	present	absent	roo+278 (polymorphic)
RAL911	no data	no data	absent	no data	absent	absent	absent	no data	absent	absent
RAL405	no data	no data	absent	absent	absent	absent	absent	no data	absent	absent
RAL822	absent	no data	absent	absent	absent	absent	no data	no data	absent	absent
RAL195	absent	absent	absent	absent	no data	no data	present	no data	absent	roo-44
RAL855	absent	absent	absent	no data	absent	no data	absent	absent	absent	absent
RAL502	absent	absent	absent	present	absent	absent	absent	absent	absent	roo+278
RAL802	present	no data	absent	absent	absent	absent	absent	absent	absent	FBti0019985
RAL908	absent	absent	absent	absent	absent	absent	absent	absent	absent	absent
RAL508	absent	absent	absent	absent	absent	absent	absent	absent	absent	absent
RAL40	absent	absent	absent	absent	absent	absent	absent	absent	absent	absent
RAL801	no data	absent	absent	absent	absent	absent	absent	absent	absent	absent
RAL783	absent	absent	polymorphic	absent	absent	absent	absent	absent	absent	roo+175 (polymorphic)
RAL383	absent	absent	absent	absent	absent	absent	present	absent	absent	roo-44
RAL75	absent	no data	absent	no data	absent	absent	no data	present	no data	roo-68
RAL857	absent	absent	absent	absent	absent	absent	absent	absent	polymorphic	roo-90 (polymorphic)
RAL441	absent	absent	absent	absent	absent	absent	absent	absent	polymorphic	roo-90 (polymorphic)
RAL21	absent	absent	absent	absent	absent	absent	absent	absent	present	roo-90 (polymorphic)
RAL177	absent	absent	absent	absent	absent	absent	absent	absent	present	roo-90 (polymorphic)
RAL639	present	no data	absent	absent	no data	no data	absent	absent	absent	FBti0019985
RAL887	no data	no data	absent	absent	absent	absent	absent	absent	absent	absent
*Note that these strains where also estimated with PCR
